Phosphorus acquisition efficiency in arbuscular mycorrhizal maize is correlated with the abundance of root-external hyphae and the accumulation of transcripts encoding PHT1 phosphate transporters

Ruairidh J. H. Sawers<sup>1,2\*</sup>, Simon F. Svane<sup>3,4</sup>, Clement Quan<sup>5</sup>, Mette Grønlund<sup>3,4</sup>, Barbara Wozniak<sup>2</sup>, Eliécer González-Muñoz<sup>1</sup>, Ricardo A. Chávez Montes<sup>1</sup>, Ivan Baxter<sup>6</sup>, Jerome Goudet<sup>7</sup>, Iver Jakobsen<sup>3,4</sup> and Uta Paszkowski<sup>2,5</sup>

1. Laboratorio Nacional de Genómica para la Biodiversidad (LANGEBIO), Centro de Investigación y de Estudios Avanzados del Instituto Politécnico Nacional (CINVESTAV-IPN), Irapuato C.P. 36821, Guanajuato, Mexico.
2. Department of Plant Biology, University of Lausanne, 1014 Lausanne, Switzerland
3. Department of Chemical and Biochemical Engineering, Technical University of Denmark, DK-2800 Kgs. Lyngby, Denmark
4. Department of Plant and Environmental Sciences, Faculty of Science, University of Copenhagen, Thorvaldsensvej 40, DK-1871 Frederiksberg C, Denmark
5. Department of Plant Sciences, University Cambridge, Cambridge CB2 3EA, UK
6. USDA-ARS, Donald Danforth Plant Science Center, St. Louis, Missouri, 63132, United States of America
7. Department of Ecology and Evolution, University of Lausanne, 1014 Lausanne, Switzerland

\*Author for correspondence:

Ruairidh J. H. Sawers

Laboratorio Nacional de Genómica para la Biodiversidad (LANGEBIO), Centro de Investigación y de Estudios Avanzados del Instituto Politécnico Nacional (CINVESTAV-IPN), Irapuato C.P. 36821, Guanajuato, Mexico.

Tel. +52 462 1663012

E-mail: [rusawers@cinvestav.mx](mailto:rusawers@cinvestav.mx)

Word count: 5555 (Introduction: 952, Materials and Methods: 1455, Results: 1850, Discussion: 1250, Acknowledgements: 48).

Figures: 6 (All colour)

Tables: 2

*Supporting Information* as PDF; Fig.S1 – S7; Table S1 – S4; Analysis.

## SUMMARY

- Plant interactions with arbuscular mycorrhizal fungi have long excited interest for their potential to promote more efficient use of mineral resources in agricultural production. Their use, however, remains limited, in part because of a lack of understanding of the factors that determine symbiotic outcome. In this work, variation in response to arbuscular mycorrhizal colonization was characterized a panel of genetically diverse maize inbred lines.
- The parents of the maize Nested Association Mapping population were evaluated, with and without colonization, in early vegetative stages. Subsequently, six lines with contrasting phenotypes were selected for further characterization, including quantification of fungal colonization, mycorrhiza-mediated phosphorus uptake, and accumulation of transcripts encoding plant PHT1 family phosphate transporters.
- The relative growth of lines changed between non-inoculated and inoculated plants, indicative of variation in host capacity to profit from symbiosis. Patterns of *Pht1* transcript accumulation varied among lines, and were correlated with outcome.
- Larger growth responses were correlated with more extensive development of root-external hyphae, increased accumulation of specific *Pht1* transcripts and a high level of mycorrhiza-mediated phosphorus uptake. The data suggest that host genetic factors influence fungal growth strategy with subsequent impact on plant biomass production.

Key words: arbuscular mycorrhiza, maize, PHT1, phosphorus, root-external hyphae

## 1 INTRODUCTION

2 The rising cost of agricultural inputs and an increasing awareness of the negative  
3 environmental consequences have resulted in ever greater interest in beneficial crop-microbe  
4 interactions and their potential application (Perez-Montano *et al.*, 2014; Vance, 2014). The  
5 most prevalent nutrient-delivering symbiosis is the association of plants with fungi of the  
6 phylum *Glomeromycota*, resulting in the formation of arbuscular mycorrhizas (Smith &  
7 Read, 2008). More than 80% of extant terrestrial plants establish arbuscular mycorrhizal  
8 (AM) symbioses, and this fundamental capacity has been retained in major crop species  
9 throughout the processes of domestication and improvement (*e.g.* Koide *et al.*, 1988; Hetrick  
10 *et al.*, 1992; Kaeppler *et al.*, 2000; Sawers *et al.*, 2008). Concomitantly, these same crops  
11 have retained a conserved molecular machinery required for symbiotic establishment and  
12 nutrient exchange (Paszkowski *et al.*, 2002; Gutjahr *et al.*, 2008; Yang *et al.*, 2012; Willman  
13 *et al.*, 2013).

14 AM fungi provide the plant host with greater access to soil nutrients and water  
15 through connection to a network of fungal hyphae more extensive than the plant's own root  
16 system (Bucher, 2007). In addition, AM symbioses have been implicated in enhanced  
17 tolerance to a range of abiotic and biotic stresses (Smith & Read, 2008). Such benefits are not  
18 provided without cost, however, and the plant host must provide carbohydrates to the fungus,  
19 which represents a diversion of photosynthetically fixed carbon away from primary  
20 productivity and yield. Ultimately, the outcome, which may be positive or negative, is  
21 dependent not only on the specific plant-fungus combination (Walder *et al.*, 2012) but on the  
22 requirements and limitations imposed by any given environment (Janos, 2007). Indeed, in  
23 high-input modern agricultural systems, the benefit of the symbiosis to the plant may be

24 marginal (Grace *et al.*, 2009), and it has been hypothesized that conventional breeding  
25 practices may have promoted weakening of the mutualism (Hetrick *et al.*, 1992, 1996).  
26 Comparisons of mycorrhizal response, however, can be complicated by variation in overall  
27 plant adaptation to a given set of conditions - poorly adapted plants will typically show the  
28 greatest performance increase following AM colonization (e.g. Hetrick *et al.*, 1992; Kaeppeler  
29 *et al.*, 2000), although such improvement need not indicate a superior capacity to benefit  
30 from colonization *per se* (Sawers *et al.*, 2010). The maize mutant *lrt1*, which exhibits reduced  
31 lateral root development, illustrates an extreme case: high dependency under low P  
32 availability that can be largely compensated by the formation of AM symbiosis (Paszkowski  
33 & Boller, 2002). The question remains as to whether, and how, certain varieties derive  
34 greater benefit from AM symbioses than others and to what extent plant breeding can  
35 optimize these interactions for agricultural systems (Sawers *et al.*, 2008; Fester & Sawers,  
36 2011). A better understanding of the molecular and physiological impact of AM symbiosis  
37 has the potential to enhance greatly interpretation of outcome variation.

38         The best characterized benefit of AM symbiosis is enhanced plant phosphorus (P)  
39 nutrition. Given that limited P availability is a major check on global agricultural production  
40 and food security, assessment of AM outcome in terms of P nutrition is a justifiable  
41 approximation of this complex symbiotic trade-off. The efficiency with which crop plants  
42 convert P resources to yield (P Efficiency; PE) can be partitioned between the efficiency of  
43 uptake (P Acquisition Efficiency; PAE), and the efficiency of internal use (P Use Efficiency;  
44 PUE) (Rose *et al.*, 2011; Veneklaas *et al.*, 2012), AM symbiosis most directly impacting the  
45 former. Levels of P fertilizer uptake in agricultural systems are typically low (15-20%; Syers  
46 *et al.*, 2008), largely as a result of the relative immobility of P in the soil and the ready

47 formation of a zone of P depletion around the root (Bucher, 2007). Optimization of the root  
48 system architecture can contribute significantly to P foraging (Lynch, 2011), but, under a  
49 given set of conditions, AM symbioses may present the greatest opportunity to access a  
50 greater soil volume. Physiological studies have demonstrated that symbiotic phosphate  
51 uptake is a distinct functional alternative to direct uptake by the plant (Smith *et al.*, 2003;  
52 Bucher, 2007), and in a field setting, the majority of the phosphate taken up by a plant may be  
53 acquired via the symbiotic route (Schweiger and Jakobsen, 1999; Smith *et al.*, 2003; Yang *et*  
54 *al.*, 2012).

55         Molecular analyses have supported the distinction between symbiotic and direct  
56 phosphate uptake, identifying the various members of the plant PHT1 P transporter family to  
57 play roles specific to the the two pathways. Where plants are competent to host AMF, there is  
58 at least one family member (PT11 in rice and variously named orthologs in other species)  
59 acting predominantly, or exclusively, during AM symbiosis (Rausch *et al.*, 2001; Harrison *et*  
60 *al.*, 2002; Paszkowski *et al.*, 2002; Glassop *et al.*, 2005; Nagy *et al.*, 2005; Maeda *et al.*,  
61 2006; Caesar *et al.*, 2014; Walder *et al.*, 2015). Mutant analysis has demonstrated PT11  
62 proteins to be essential for formation and maintenance of AM symbiosis (Maeda *et al.*, 2006;  
63 Javot *et al.*, 2007; Yang *et al.*, 2012), although this phenotype has been partially rescued by  
64 nitrogen starvation in medic (Breuillin-Sessoms *et al.*, 2015) and co-cultivation with wild-  
65 type plants in maize (Willmann *et al.*, 2013). In medic, the PT11 protein MtPT4 has been  
66 localized to the peri-arbuscular membrane (Harrison *et al.*, 2002; Kobae & Hata, 2010;  
67 Pumplin *et al.*, 2012), and the PT11 proteins are considered to provide the principal route of P  
68 uptake from fungus to plant.

69 In this study, differences in mycorrhiza response among a panel of diverse maize lines  
70 are dissected to identify variation linked to a greater ability of the host to profit from the  
71 symbiosis. Selected lines were further characterized by quantification of AM-mediated and  
72 total P uptake, fungal colonization of roots and soil, and accumulation of transcripts encoding  
73 PHT1 family P transporters.

74

## 75 **MATERIALS AND METHODS**

### 76 **Evaluation of response to AMF in maize diversity panel**

77 A panel of 30 diverse maize lines, comprising the 26 diverse inbred founders of the maize  
78 NAM population (McMullen *et al.*, 2009), Pa36 (a line tolerant of low P availability;  
79 Kaeppler *et al.*, 2000), and the lines B73, W22 and W64A (a line used previously for study of  
80 AM symbiosis; Paszkowski *et al.*, 2006), was evaluated in one litre pots, under conditions of  
81 low phosphorus availability, with or without inoculation with *Funneliformis mosseae* (isolate  
82 number 12, European Bank of Glomales, <http://www.kent.ac.uk/bio/beg/>), as previously  
83 described (Sawers *et al.*, 2010). At 8 weeks after emergence, the aerial part of the plant was  
84 harvested, dried and weighed. Six experiments (A-F) were conducted in the greenhouse  
85 facility at the University of Lausanne, Switzerland, during the period 2007 - 2010. Each  
86 treatment was replicated three times in each experiment, with the exception of experiment D  
87 in which each treatment was replicated five times. Shoot dry weight data was analyzed  
88 without further transformation for clarity. Systematic variation among experiments was  
89 eliminated using linear estimation. The experiment effect was estimated separately for non-  
90 inoculated and inoculated plants. Mycorrhiza response was estimated for each genotyping by  
91 calculation of a *t*-interval for the difference of inoculated and non-inoculated means. All

92 analysis was performed using R statistics ([www.r-project.org](http://www.r-project.org)). See *Supporting Information*  
93 for raw data and further details.

94

#### 95 **Determination of elemental concentration by ICP-MS analysis**

96 Tissue samples were weighed then digested in 2.5mL concentrated nitric acid (AR Select  
97 Grade, VWR) with internal standard added (20ppb In, BDH Aristar Plus). Sample digestion  
98 and dilution was carried out as described in Ziegler *et al.*, 2013. Elemental concentrations of  
99 B, Na, Mg, Al, P, S, K, Ca, Mn, Fe, Co, Ni, Cu, Zn, As, Se, Rb, Mo, and Cd were measured  
100 using an Elan 6000 DRC-e mass spectrometer (Perkin-Elmer SCIEX) connected to a PFA  
101 microflow nebulizer (Elemental Scientific) and Apex HF desolvator (Elemental Scientific)  
102 using the procedure described in Ziegler *et al.* To correct for machine drift both during a  
103 single run and between runs, a control solution is run every tenth sample. All analysis was  
104 performed using R statistics. See *Supporting Information* for raw data and full analysis.

#### 105 **Characterization of AM phosphorus uptake in six selected lines**

106 Six maize lines with different low P tolerance were selected and evaluated at the Technical  
107 University of Denmark. Plants were grown in 2.4 L PVC tubes in accordance with Smith *et al.*  
108 *et al.*, 2003. The growth medium (hereafter referred to as soil) contained 7.9 mg 0.5M  
109 bicarbonate-extractable P kg<sup>-1</sup> (Olsen *et al.*, 1954) and was a 1:1 (w:w) mixture of sand and  
110 irradiated soil (10 kGy, 10 MeV electron beam) that received basal nutrients (Pearson &  
111 Jakobsen, 1993) and KH<sub>2</sub>PO<sub>4</sub> at nil, 15 or 90 mg P kg<sup>-1</sup>. All nutrients were added in solution  
112 and carefully mixed into the soil. The root plus hyphal compartment (RHC) contained 2750 g  
113 soil and the hyphal compartment (HC) was a small plastic vial placed in the middle of the  
114 RHC. The HC contained 55 g of <sup>33</sup>P labeled soil (5 kBq g<sup>-1</sup>) and lined with a 25 µm nylon

115 mesh at both ends to prevent root in-growth. Seven weeks later, bicarbonate extracts had a  
116 specific activity (SA =  $^{33}\text{P}/^{31}\text{P}$ ) of 144.7, 79.9 or 29.4 kBq mg<sup>-1</sup> P in soil amended with nil, 15  
117 or 90 mg P kg<sup>-1</sup>. Each maize line was grown in 8 replicate pots in half of which 140 g dry  
118 soil-root inoculum of *Rhizophagus irregularis* BEG87 was thoroughly mixed into the growth  
119 medium. Filtered BEG87 inoculum leachings were added to all pots as an attempt to establish  
120 the same soil microbial community (Pearson & Jakobsen, 1993). Two pre-germinated seeds  
121 were planted in each pot and thinned to one at the two leaf stage. Plants were maintained  
122 under controlled conditions (12 hour day length at 500  $\mu\text{mol m}^{-2} \text{sec}^{-1}$ , 28/20°C day/night and  
123 60 % relative humidity) and watered daily by weight to 70% of the water holding capacity. In  
124 addition to the initial basal nutrient dressing, supplemental N ( $\text{NH}_4\text{NO}_3$ ), Mg and S ( $\text{MgSO}_4^{2-}$ )  
125 was added periodically to additionally provide 375 mg N, 15 mg Mg and 20 mg S per pot.  
126 Shoots were harvested at growth stage 51 (BBCH scale; tassel emergence at the top of the  
127 stem), oven dried to constant weight at 70°C and dry weights were recorded. Roots system  
128 was carefully washed clean using a pressurized water jet and a fine mesh to collect fine root  
129 pieces. Roots were blotted dry and total fresh weight (FW) was recorded. Subsamples were  
130 taken for root length/colonization measurement (1.5g FW, stored in 50% EtOH) and RNA  
131 extraction (1g, flash-frozen in liquid nitrogen). Dried and ground shoot and root samples  
132 were oxidized in a 4:1 mixture (v:v) of 65% nitric:70% perchloric acids, and total P was  
133 determined by the molybdate blue method using AutoAnalyzer 3 (Bran+Luebbe, Norderstedt,  
134 Germany). The  $^{33}\text{P}$  in shoot tissue was determined in the same digests in a Packard TR 1900  
135 liquid scintillation counter (PerkinElmer, Waltham, MA, USA). Specific activities of  $^{33}\text{P}$  in  
136 shoots and in bicarbonate extracts of HC soil were used to estimate the relative contribution  
137 of the AM pathway to total shoot P uptake as described in Smith *et al.* (2004). Root length



138 was measured by image analysis using the Win-Rhizo software (Win-Rhizo version 2009b,  
139 Regent Instruments, Canada) and a scanner (Epson (ModelJ1221A), Seiko Epson Corp.  
140 Japan). Images were acquired by placing 1.5 g untangled roots (FWRL), from the RHC  
141 subsample in a water filled Plexiglas tray (17.5 x 23.9 cm). Total root length of each plant  
142 was calculated as  $RL \times FWR_{root} \times (FWRL)^{-1}$ . The abundance of total fungal structures  
143 (hyphae, arbuscules or vesicles) or arbuscules specifically was evaluated microscopically as  
144 percentage of root length using the grid-line intersect method (Newman, 1966) after clearing  
145 and staining (Kormanik & McGraw, 1982). Hyphal length was measured by a grid  
146 intersection method after wet-sieving of aqueous soil suspensions on membrane filters  
147 (Jakobsen *et al.*, 1992). Where appropriate, mycorrhiza response was estimated for each  
148 genotyping by calculation of a *t*-interval for the difference of inoculated and non-inoculated  
149 means. All analysis was performed using R statistics. See *Supporting Information* for raw  
150 data and full analysis

#### 151 **Bioinformatic identification of maize *Pht* genes**

152 To identify a complete set of putative PHT1 encoding genes in maize, the *Saccharomyces*  
153 *cerevisiae* PHO84 protein (Uniprot id P25297) was used as a BlastP query (Altschul *et al.*,  
154 1990) to search the primary transcript predicted protein sequences from version 6a of the  
155 annotated B73 maize genome (Schnable *et al.*, 2009), obtained from Phytozome 10  
156 (Goodstein *et al.* 2012). Using a cut-off E-value of  $1e^{-54}$ , 13 gene-models were retrieved and  
157 aligned using MUSCLE (Edgar, 2004). All 13 sequences contained the conserved  
158 GGDYPLSATIxSE motif in helix 4 reported previously to be present in PHT proteins  
159 (Karandashov & Bucher, 2005). The resulting block-alignment file was converted to  
160 Stockholm 1.0 format, and used as input to hmmbuild (HMMER suite version 3.1b2) to

161 search (hmmsearch) the maize primary transcript predicted protein sequences for additional  
162 PHT1 proteins. 35 new protein sequences were identified based on an inclusion threshold of  
163 E-value <0.01. None of these additional sequences, however, contained the conserved  
164 GGDYPLSATIxSE motif and consequently there were not considered to be authentic PHT1  
165 proteins. The final list of 13 maize PHT1 encoding gene models is presented in Supporting  
166 Information.

### 167 **Analysis of *ZmPt* transcript accumulation**

168 A LightCycler 480 SYBR green I master mix kit (Roche; Mannheim, Germany) was used to  
169 prepare samples before analysis on a Roche 480 LightCycler. Each biological sample was  
170 analysed as three technical replicates. Three water controls were used for each gene tested.  
171 qRT-PCR expression and melting curves were calculated using the LightCycler 480 software  
172 (Roche, Version 1.5.9, Mannheim, Germany). Samples were normalized to the geometric  
173 mean of expression levels of 3 constitutive genes (*GAPDH*, *Cyclophilin2*, *β-actin*) as  
174 described earlier (Gutjahr *et al.*, 2008). In total 6 phosphate transporters were analysed  
175 together with an AM specific marker gene *ZmAm3*, ortholog of *OsAM3* (Gutjahr *et al.*, 2008)  
176 and a *Rhizophagus irregularis* elongation factor gene (Sokolski *et al.*, 2010). Statistical  
177 analysis was performed using R statistics. See Supporting Information for full analysis.

178

### 179 **Principal component analysis of combined growth, physiology and molecular data sets**

180 Pairwise correlations were calculated for a matrix of growth, physiological and molecular  
181 data obtained from six selected lines as described above (shoot dry weight, shoot P, root dry  
182 weight, root P, total colonization, arbuscule abundance, length of root-external hyphae, P  
183 uptake from the hyphal compartment, transcript accumulation of *Pt6*, *Pt8b*, *Pt11*, *Pt13a*,

184 *Pt13b*, *Am3* and *RiEF*) using `rcorr::rcorr` in the R statistics package and the results visualized  
185 using `corrplot::corrplot`. Principal component analysis (PCA) was performed with  
186 `ade4::dudi.pca` in the R statistics package using centered and scaled data, and the results  
187 vizualized with `ade4::scatter`.

188

## 189 **RESULTS**

### 190 **Mycorrhiza response is correlated with accumulation of phosphorus in the leaves**

191 To define physiological and molecular patterns correlated with variation in the outcome of  
192 AM symbioses, a panel of thirty diverse maize lines (see Materials and Methods), was  
193 evaluated under P limiting conditions in the greenhouse, with (M) or without (NC)  
194 inoculation with the fungus *Funneliformis mosseae*. Plants were harvested eight weeks after  
195 emergence (V8 stage, before the onset of flowering; Counce *et al.*, 2000) and shoot dry-  
196 weight (SDW; g) determined (Table 1). Collectively, the evaluated lines showed a positive  
197 outcome when inoculated with AMF (Fig. S1), with a significant ( $p < 0.001$ ) increase in  
198 mean SDW from 1.05g in NC plants to 2.16g in M plants, equating to a panel-wide  
199 mycorrhiza response ( $MR = M - NC$ ) of  $1.1\text{g} \pm 0.08\text{g}$  (95% interval for difference in means).  
200 Roots were harvested from a subset of plants, and the abundance of fungal structures  
201 quantified by microscopic inspection. NC plants were confirmed to be free of fungal  
202 structures. The greatest SDW in NC plants was seen in Pa36 (1.67g), and the lowest in Hp301  
203 (0.44g). The level of colonization in M plants was generally high, with a mean of  $57\% \pm 0.7\%$   
204 (95% interval for proportion) of root positions examined containing at least one type of  
205 fungal structure (hyphae, arbuscules or vesicles), although a broad range of colonization was  
206 observed (5% - 98%). At the level of individual lines, all showed increased SDW following

207 inoculation (Fig. 1a; Table 1). In the panel evaluation, the most responsive line was Oh43  
208 (MR = 1.85g), and the least responsive was Mo18W (MR = 0.72g). The contrast in outcome  
209 between Oh43 and Mo18W was reflected by rank-changing shifts in growth relative to other  
210 lines in the panel: similar and typical of the panel in the absence of fungus; different and  
211 outlying when inoculated (Fig. 1b). As such, Oh43 and Mo18W show similar dependence but  
212 a divergent capacity to profit from AM symbiosis.

213 Evaluation was conducted under P limiting conditions, suggesting that variation in  
214 performance would be driven largely by differences in P accumulation. To evaluate plant  
215 nutrition status, the accumulation of P and nineteen other elements was quantified in roots  
216 and leaves using inductively coupled plasma-mass spectroscopy (ICP-MS; Baxter *et al.*,  
217 2008). Ten elements (Na, Al, P, S, Mn, Fe, Co, Ni, Zn, Cd) were found to accumulate to  
218 different levels between M and NC plants, in either roots and/or leaves ( $p < 0.05$ , adjusted for  
219 multiple tests; Table S1). Principal component analysis indicated variation in P content was  
220 the most important factor differentiating lines and NC and M plants (Fig. S2). Leaf P content  
221 was positively correlated with SDW, notably in AM plants (Table 1; Fig. 1;  $p < 0.01$ ,  $r^2 = 0.24$ ).  
222 Leaf P content was similar in Mo18W and Oh43 when non-colonized (393ppm and 292ppm,  
223 respectively) but diverged when plants were inoculated (422ppm and 625ppm, respectively),  
224 mirroring SDW, and suggesting variation in P uptake efficiency to be driving the difference in  
225 MR (Fig. S3). On the basis of this initial screen, Mo18W and Oh43 were selected for more  
226 detailed physiological study. HP301 and Pa36 were selected also as they showed the lowest  
227 and highest dependence (*i.e.* NC SDW), along with the broadly used lines B73 and Mo17.

228 **Mycorrhizal response is correlated with the abundance of root-external hyphae**

229 As plant growth was correlated with P accumulation in the initial screen, it was decided to  
230 characterize in detail direct and AM P uptake across a range of P availability in the selected  
231 lines Oh43, Mo18W, Pa36, HP301, B73 and Mo17. Plants were grown in a previously  
232 described split-compartment system using  $^{33}\text{P}$  uptake and accumulation (Smith *et al.*, 2003).  
233 SDW increased with greater P addition, irrespective of AMF inoculation (Table2; Fig. 2). In  
234 contrast, average MR across lines ranged from positive to negative with increasing P  
235 availability (low P MR = 9.56g; medium P MR = 3.95g, high P MR = -1.57g). The relative  
236 MR among lines changed also with P availability. Growth at low P was strongly correlated  
237 with seed size (Fig. S4). Root dry weight (RDW) was greater in M than in NC plants at low P,  
238 was not significantly affected by colonization at medium P and was reduced in M relative to  
239 NC plants at high P (data not shown). As observed in the panel evaluation, SDW was  
240 correlated with total shoot P content, both among lines and between NC and M treatments  
241 (Fig. 2). At low P, MR (in terms of SDW) was higher in Oh43 than in the other lines,  
242 consistent with the results of the panel evaluation. Oh43 remained highly responsive at  
243 medium P, but exhibited a negative response at high P (Fig. 2). Although showing high MR at  
244 low P, Oh43 did not show a greater total root colonization than the other lines (Fig. 3a).  
245 Indeed, the proportion of root length containing arbuscules was marginally lower in Oh43  
246 than other lines (Fig. 3a). In contrast, Oh43 supported a significantly greater development of  
247 extra-radical hyphae than the other lines at low P, and the greatest AM P uptake (Fig. 3b).  
248 Across all lines, the length of root-external hyphae decreased with increasing P availability,  
249 although P uptake from HC soil increased (Fig. 3b). B73 continued to supported abundant  
250 extra-radical hyphae even at high P availability with a concomitant high level of AM P  
251 uptake.

252

253 **The maize genome encodes multiple AMF-responsive PHT1 phosphate transporters**

254 To investigate further the balance of direct and AM P uptake, transcripts encoding *Pht1*  
255 phosphate transporters were quantified. A previous report identifying 13 *Pht1*-encoding genes  
256 in the maize genome (Liu *et al.*, 2016) was confirmed using a hidden Markov search (Table  
257 S3). Maize and rice PT protein sequences were aligned, along with a number of previously  
258 characterized mycorrhiza associated sequences from other species, and this alignment used to  
259 construct a maximum likelihood tree, identifying gene groups and providing the basis for the  
260 nomenclature used below (Fig. S5; maize genes are named by similarity to rice following a  
261 nomenclature reported in doi: <http://dx.doi.org/10.1101/042028>. A key relating the  
262 nomenclature used here to that of Liu *et al.* is provided in Table S3.)

263 ZmPT11 (previously reported as ZmPHT1;6. Nagy *et al.*, 2006; Willmann *et al.*, 2013)  
264 was the unique maize member of a group including the well-characterized mycorrhiza-  
265 associated proteins medic MtPT4 (Harrison *et al.*, 2002), rice OsPT11 (Paszkowski *et al.*,  
266 2002), potato StPT4 (Nagy *et al.*, 2005) and tomato LePT4 (Nagy *et al.*, 2005). ZmPT14 was  
267 the only maize member of a second mycorrhiza-associated group that included barley HvPT8  
268 and wheat TaPT1:myc (Glassop *et al.*, 2005). ZmPT9 and ZmPT13a-d defined a further  
269 group with the mycorrhiza-associated rice protein OsPT13 (Yang *et al.*, 2012). The remaining  
270 ZmPT proteins belonged to a larger group that contained a number of rice proteins  
271 characterized previously to play roles in direct P uptake and translocation.

272 To gain a general panorama, *ZmPt* transcript accumulation was investigated using two  
273 existing seedling transcriptome datasets (Wang *et al.*, 2009; Li *et al.*, 2010) and and a third  
274 set profiling reproductive tissues (Davidson *et al.*, 2011). Representative *Pt* transcripts were

275 found in all tissues and developmental stages examined, indicating the importance of the  
276 family throughout the plant life cycle, while revealing specialization at the level of transcript  
277 accumulation (Fig. S6). Ten *Pt* transcripts were selected and quantified directly in the roots  
278 and shoots of B73 seedlings, grown under low (10 $\mu$ M), moderate (100 $\mu$ M) or high (1000 $\mu$ M)  
279 P availability in the absence of AM colonization, or under moderate P with *R. irregularis*  
280 inoculation. Seven of ten selected *Pt* transcripts (*Pt6*, *Pt7*, *Pt9*, *Pt11*, *Pt13a*, *Pt13b* and *Pt14*)  
281 accumulated differentially between NC and M plants, in at least one of the tissues assayed  
282 (Tukey HSD,  $\alpha=0.05$ ; Fig. 4). The transcripts *Pt7*, *Pt9*, *Pt11*, *Pt13a* and *Pt14* accumulated to  
283 significantly higher levels in the roots of M plants compared to NC plants. In the case of  
284 *ZmPt14*, transcripts accumulated exclusively in the roots of M plants. Transcripts encoded by  
285 *ZmPt11* were the most abundant in colonized roots, although they were present also at lower  
286 levels in roots and shoots of NC plants. The transcripts *Pt6*, *Pt9*, *Pt11*, *Pt13a* and *Pt13b*  
287 accumulated to significantly lower levels in the leaves of M plants compared to NC plants.  
288 With the exception of *ZmPt14*, all transcripts were detected in NC plants in at least one of the  
289 tissues assayed.

290

### 291 **Accumulation of *ZmPt* transcripts is correlated with mycorrhizal P uptake**

292 To investigate the relationship between AM outcome and *Pt* function, accumulation of *Pt6*,  
293 *Pt8b*, *Pt11*, *Pt13a* and *Pt13b* transcripts was quantified in root samples collected from the  
294 characterization of six selected lines. In all cases, transcript accumulation broadly followed  
295 the patterns previously observed in B73 with respect to inoculation status and P addition (Fig.  
296 S7; Supporting Information). To synthesize growth, physiological and molecular data (Table  
297 2), pairwise trait correlations were investigated across all treatments (Fig. 5a). Significant

298 positive correlations ( $p < 0.05$ ) were observed between the abundance of fungal structures  
299 and the accumulation of transcripts encoded by *RiEF*, *AM3* (respectively, fungal and plant  
300 marker transcripts) and *Pt11*, *Pt13a*, supporting the primary role of these two transporters in  
301 AM symbiosis. Accumulation of *Pt6* and *Pt13b* transcripts was significantly negatively  
302 correlated ( $p < 0.05$ ) with P accumulation and dry weight in both roots and shoots, indicating  
303 induction under low-P stress. To investigate further patterns associated with AM outcome, the  
304 analysis was repeated restricting the dataset to observations of M plants under low-P (Fig.  
305 5b). A significant positive correlation ( $p < 0.05$ ) was observed between the extent of root  
306 external hyphae and P uptake from the hyphal compartment (PHC), which in turn was  
307 positively correlated with shoot P and plant growth. Interestingly, the abundance of intra-  
308 radical fungal structures was strongly, if not significantly, negatively correlated with both the  
309 extent of root-external hyphae and PHC. At the molecular level, accumulation of *Pt6* and  
310 *Pt8b* transcripts was significantly positively correlated ( $p < 0.05$ ) with root dry weight, and,  
311 at lesser significance, with SDW, root and shoot P content and PHC. Accumulation of *Pt13a*  
312 transcripts showed also a weakly significant ( $p < 0.1$ ) positive correlation with shoot dry  
313 weight. Trait correlation in M plants at low-P was investigated further using principal  
314 component (PC) analysis. Collectively, the first two PCs captured 76% of the trait variation  
315 and well separated the six lines (Fig. 6). The abundance of root-external hyphae, PHC and  
316 shoot P were observed to increase together with root and shoot dry weight and accumulation  
317 of *Pt6* and *Pt8b*. Accumulation of the *Pt6* and *Pt8b* transcripts was more tightly associated  
318 with increasing root and shoot dry weight than with root-external hyphae or PHC. Oh43 was  
319 characterized by high levels of root-external hyphae, PHC, shoot P and MR. The line Pa36  
320 was associated more with higher dry weight than higher PHC. Total AM colonization and



321 arbuscule abundance was antagonistic to the abundance of root-external hyphae, Hp301 and  
322 Mo18W exhibiting high levels of intra-radical fungal structures, but low levels of root-  
323 external hyphae, P accumulation, and root and shoot dry weight. Mo17 was distinct in  
324 expressing high levels of accumulation of AM associated transcripts, although with no  
325 associated increase in colonization, development of root-external hyphae or MR.

## 326 **DISCUSSION**

327 Data presented in this study reveal genetic variation in the capacity of maize varieties to  
328 profit from AM symbiosis, beyond differences in plant dependence (Janos 2007; Sawers *et*  
329 *al.*, 2008, 2010). Evaluation of the relative growth of thirty highly diverse lines (McMullen *et*  
330 *al.*, 2009) distinguished those that were highly responsive on the basis of poor performance in  
331 the absence of symbiosis (*e.g.* HP301) from those that benefited more from the symbiosis *per*  
332 *se* (*e.g.* Oh43). Support for this initial interpretation was obtained by detailed physiological  
333 characterization that provided a mechanistic explanation, and linked superior responsiveness  
334 to enhanced PAE on the basis of greater abundance of root-external hyphae.

335 P limitation of plant growth results primarily from the low mobility of P in the soil,  
336 especially at non-neutral pH, with AM fungi acting primarily to increase PAE through  
337 enhanced soil foraging (Smith & Read, 2008). Indeed, in this study, it was observed that  
338 increased plant growth in AM colonized plants was accompanied by greater P uptake. On  
339 reaching the root surface, or being delivered to the peri-arbuscular space, P will be rapidly  
340 taken up through the action of high-affinity PHT1 phosphate transporters, not limiting PAE.  
341 In contrast, movement of P into the vicinity of the root will be slow, resulting in the formation  
342 of a zone of P depletion surrounding the root (Bucher, 2007). As is consistent, it was not the  
343 extent of intra-radical colonization nor the accumulation of *Pt11* transcripts that showed the

344 greatest correlation with P uptake, but the abundance of root-external hyphae. If anything,  
345 greater arbuscule abundance was negatively correlated with MR, HP301 and Mo18W  
346 exhibiting high levels of colonization but low levels of AM P uptake. This is in general  
347 support of previous studies (*e.g.* Schweiger & Jakobsen 1999, Jakobsen *et al.*, 2001, Yao *et*  
348 *al.*, 2001, Schnepf *et al.*, 2008), including an evaluation of diverse fungal isolates with a  
349 common plant host, which again found a similar correlation between fungal P uptake and  
350 hyphal length (Munkvold *et al.*, 2004). Although a further report characterizing AM response  
351 variation in four Chinese maize varieties (Chu *et al.*, 2013) did not reveal a clear relationship  
352 between P uptake and the length of root-external hyphae, this may be a function of the  
353 specific genotypes evaluated, of the fact that the contribution of mycorrhizal P uptake was not  
354 directly quantified. Regarding the apparent antagonism between the abundance of intra-  
355 radical and root-external fungal structures, the data are consistent with a trade-off in fungal  
356 growth, the balance of which is influenced by plant genetic factors. Given the importance of  
357 hyphal abundance to PUE, the data suggests that quantification of intra-radical structures  
358 alone is not predictive of MR, nor an indication of the strength of mutualism.

359       Prior physiological characterization has demonstrated that AM P uptake is not a simple  
360 addition to the plant's direct uptake pathway, but may represent a functional alternative: in the  
361 extreme case, a colonized plant may obtain nearly all of its P requirement via the AM  
362 pathway, whether as a result of down regulation of the direct pathway or owing to a greater  
363 efficiency of fungal P foraging compared with that of plant roots (Smith *et al.*, 2003; Schnepf  
364 *et al.*, 2008). Furthermore, the AM pathway may remain important at higher P availability,  
365 even when MR itself is small, or even negative. In the evaluation of six selected lines,  
366 increasing the availability of P resulted in reduced abundance of both root-external and intra-

367 radical fungal structures, along with declining MR. Nonetheless, the absolute quantity of P  
368 obtained via the AM pathway was greater, presumably as the result of increased Pi in solution  
369 as the capacity of the soil to adsorb P was saturated. At highest availability, in the lines with  
370 the highest P uptake, the growth response to shoot P accumulation was apparently saturated.  
371 B73 and Pa36 attained maximum growth irrespective of AM inoculation, although in both M  
372 plants accumulated less shoot P in the shoots than NC plants, *i.e.* they exhibited greater PUE.  
373 Interestingly, although at high P B73 and Pa36 showed equivalent levels of intra-radical  
374 fungal structures, the abundance of the root-external hyphae was greater in B73. Indeed, B73  
375 supported a high level of root-external hyphae, second only to Oh43 at low P and greater than  
376 all other lines at high P Collectively, these data illustrate the complexity of determining  
377 symbiotic outcome, and the range of plasticity among even six lines, with respect to just a  
378 single environmental variable.

379 Previous transcriptome profiling has identified rice marker genes whose mRNA  
380 accumulation correlates well with the establishment and development of AM symbiosis, well  
381 differentiating colonized from non-colonized plants (*e.g.* Guimil *et al.*, 2005; Gutjahr *et al.*,  
382 2015). In this study, transcripts encoding PHT1 phosphate transporters were quantified not  
383 only to generalize among NC and M plants, but also to investigate differences in AM  
384 outcome among lines. Overall, AM colonization was positively correlated with the  
385 accumulation of transcripts encoded by *Pt11*, and to a lesser extent those encoded by *Pt13a*,  
386 *Pt13b* and *Pt14*, consistent with previous reports (Nagy *et al.*, 2006; Willmann *et al.*, 2013;  
387 Liu *et al.*, 2016). Arbuscule abundance was found to be a poor predictor of MR among the six  
388 lines evaluated in this study. It is therefore consistent that variation in *ZmPt11* transcript  
389 accumulation was also largely independent of differences MR. These observations are

390 consistent with the physiological data suggesting P transfer at the peri-arbuscular interface to  
391 be non-limiting, either with respect to arbuscule abundance or to the concentration of PT11  
392 proteins in the peri-arbuscular membrane. PT11 protein, however, has been reported also to  
393 regulate developmental responses to P limitation (Volpe *et al.*, 2016), and high levels of *Pt11*  
394 accumulation may have additional significance beyond P transfer. A number of additional  
395 maize *Pt* transcripts responded to AM inoculation, although they were less abundant than  
396 those encoded by *Pt11*. Significantly, at low P, a mild positive correlation was observed  
397 between accumulation of *Pt13* transcripts and shoot biomass among colonized plants,  
398 indicating a role in the regulation of the symbiosis. Accumulation of *Pt6* and *Pt8b* transcripts,  
399 although generally lower in M relative to NC plants, was positively correlated with root and  
400 shoot dry weight among M lines. Accumulation of *Pt8b* was positively correlated also with P  
401 uptake from the hyphal compartment. Interestingly, the correlation was stronger with dry  
402 weight than P content, indicating this to be more than a secondary effect of differences in P  
403 accumulation. These observations, along with previous characterization of *pt11* and *pt13*  
404 mutants in rice (Yang *et al.*, 2012), suggest a role for PHT1 proteins not only in P uptake but  
405 in the fine tuning of cost-benefit in AM symbioses.

406 Previous characterization of variation in MR has placed an emphasis on the  
407 development of intra-radical fungal structures, and marker transcripts have been identified  
408 allowing molecular-based quantification of intra-radical colonization. In this study, it was  
409 observed that variation in the abundance of root-external hyphae was more significant than  
410 levels of intra-radical colonization in determining AM outcome. Although accumulation of  
411 the well characterized *Pt11* transcript was not predictive of the abundance of extra-radical  
412 hyphae, correlations were observed between transcripts encoded by other *Pt* genes,

413 abundance of extra-radical hyphae and AM outcome. The identification of such variation,  
414 coupled with the availability of NAM populations for quantitative trait loci mapping  
415 (McMullen *et al.*, 2009), opens up the possibility to characterize the genetic basis of host  
416 effects on the development of extra-radical hyphae, and potentially to develop molecular  
417 breeding strategies to target this important, but hard to evaluate, component of MR.

418

#### 419 **ACKNOWLEDGEMENTS**

420 This work was supported by the Swiss National Science Foundation ‘professeur boursier’  
421 grants PP00A-110874, PP00P3-130704, by the Gatsby Charitable Foundation grant  
422 RG60824, by The Danish Council for Independent Research, Technology and Production  
423 Sciences grant 0602-01412B and by the Mexican National Council of Science and  
424 Technology (CONACYT) grant CB2012-151947. We thank Mesfin Nigussie Gebreselassie  
425 and Matthias Mueller for assistance with plant growth and evaluation.

426

#### 427 **AUTHOR CONTRIBUTION**

428 Diversity screen: RS, BW, UP. Ionomics analysis: IB. Physiological characterization of  
429 phosphate uptake in selected lines: SS, MG, IJ. Identification of *Pht1* genes and phylogenetic  
430 analysis: EGM, RCM, RS. Quantification of transcript accumulation: CQ, SS. Statistical  
431 analysis: JG, RS. Experimental design: UP, IJ, RS. All authors contributed to data  
432 interpretation and writing of the manuscript.

**Table 1.** Mycorrhiza response in diverse maize lines

| Line   | Dry mass (g) |      |                   | Leaf P (ppm +/- SE) |             |
|--------|--------------|------|-------------------|---------------------|-------------|
|        | NC           | M    | MR (95% CI)       | NC                  | M           |
| Oh43   | 0.96         | 2.81 | 1.85 (1.31 ,2.38) | 292 +/- 42          | 625 +/- 72  |
| CML322 | 1.13         | 2.59 | 1.47 (0.8 ,2.14)  | 375 +/- 47          | 489 +/- 3   |
| HP301  | 0.44         | 1.82 | 1.37 (0.91 ,1.84) | 475 +/- 50          | 383 +/- 106 |
| A188   | 0.98         | 2.3  | 1.32 (1.04 ,1.61) | 598 +/- 102         | 537 +/- 46  |
| W64    | 1.02         | 2.34 | 1.32 (0.91 ,1.73) | 341                 | 427 +/- 107 |
| B97    | 0.74         | 2.04 | 1.31 (0.89 ,1.73) | 455 +/- 64          | 546 +/- 12  |
| NC350  | 0.86         | 2.17 | 1.31 (0.8 ,1.81)  | 374 +/- 43          | 553 +/- 61  |
| M162W  | 1            | 2.23 | 1.23 (0.86 ,1.61) | 321                 | 322 +/- 32  |
| P39GB  | 0.87         | 2.11 | 1.23 (0.79 ,1.67) | 289 +/- 38          | 325 +/- 54  |
| Pa36   | 1.67         | 2.91 | 1.23 (0.71 ,1.76) | 469 +/- 13          | 572 +/- 62  |
| Ms71   | 1.4          | 2.62 | 1.22 (0.71 ,1.73) | 376 +/- 60          | 571 +/- 41  |
| CML333 | 1.19         | 2.4  | 1.2 (0.8 ,1.61)   | 327 +/- 25          | 546 +/- 77  |
| Mo17   | 1.53         | 2.7  | 1.17 (0.7 ,1.64)  | 490 +/- 34          | 548 +/- 46  |
| CML103 | 1.37         | 2.52 | 1.15 (0.87 ,1.43) | 294 +/- 69          | 493 +/- 48  |
| CML52  | 0.81         | 1.9  | 1.1 (0.7 ,1.49)   | 285 +/- 68          | 429 +/- 31  |
| Ki11   | 1.02         | 2.1  | 1.08 (0.75 ,1.42) | 283 +/- 35          | 396 +/- 66  |
| IL14H  | 0.96         | 2.03 | 1.07 (0.8 ,1.34)  | 375 +/- 47          | 353 +/- 108 |
| B73    | 0.78         | 1.82 | 1.05 (0.78 ,1.31) | 498 +/- 113         | 364 +/- 80  |
| CML277 | 0.93         | 1.96 | 1.03 (0.6 ,1.45)  | 416 +/- 90          | 468 +/- 43  |
| CML228 | 1.38         | 2.35 | 0.97 (0.66 ,1.27) | 396 +/- 43          | 403 +/- 100 |
| M37W   | 0.94         | 1.91 | 0.97 (0.38 ,1.57) | 390 +/- 37          | 535 +/- 117 |
| CML247 | 1.08         | 1.98 | 0.9 (0.62 ,1.18)  | 334 +/- 71          | 398 +/- 9   |
| Tx303  | 0.7          | 1.61 | 0.9 (0.46 ,1.34)  | 423 +/- 32          | 443 +/- 18  |
| Ki3    | 0.94         | 1.79 | 0.85 (0.53 ,1.16) | 496 +/- 25          | 401 +/- 50  |
| Ky21   | 1.23         | 2.08 | 0.84 (0.49 ,1.19) | 350 +/- 74          | 363 +/- 28  |
| NC358  | 1.22         | 2.03 | 0.8 (0.42 ,1.19)  | 414 +/- 39          | 393 +/- 62  |
| W22    | 1.15         | 1.93 | 0.78 (0.43 ,1.13) | 480 +/- 100         | 465 +/- 101 |
| Oh7b   | 1.05         | 1.81 | 0.76 (0.39 ,1.13) | 236 +/- 26          | 550 +/- 78  |
| Tzi8   | 1.48         | 2.24 | 0.76 (0.38 ,1.15) | 340 +/- 24          | 340 +/- 34  |
| Mo18W  | 0.94         | 1.66 | 0.72 (0.44 ,1)    | 393 +/- 39          | 422 +/- 31  |

Dry mass (g) and phosphorus (P) accumulation (ppm) in non-colonized (NC) and mycorrhizal (M) plants from the evaluation of 30 lines. Mycorrhiza response (MR) was calculated as M-NC, numbers in parentheses report a 95% confidence interval (CI). P accumulation reported +/- one standard error (SE).

**Table 2.** Summary of growth, physiological and molecular data

| P     | AMF   | Line  | SDW   | Shoot P | RDW | Root P | Col Tot | Col Arb | Hyp   | PHC  | <i>Pt6</i> | <i>Pt8b</i> | <i>Pt11</i> | <i>Pt13a</i> | <i>Pt13b</i> | <i>Am3</i> | <i>RiEF</i> |     |
|-------|-------|-------|-------|---------|-----|--------|---------|---------|-------|------|------------|-------------|-------------|--------------|--------------|------------|-------------|-----|
|       |       |       | (g)   | (mg)    | (g) | (mg)   | (%)     | (%)     | (m/g) | (mg) |            |             |             |              |              |            |             |     |
| High  | AMF   | B73   | 30    | 76      | 12  | 17     | na      | na      | na    | na   | 0.5        | 0.7         | 0.1         | 0            | 0            | 0          | 0           |     |
|       |       | Mo17  | 25    | 63      | 7   | 11     | na      | na      | na    | na   | 0.6        | 0.8         | 0           | 0            | 0            | 0          | 0           |     |
|       |       | HP301 | 28    | 67      | 9   | 14     | na      | na      | na    | na   | 0.4        | 0.4         | 0.3         | 0.1          | 0            | 0          | 0           |     |
|       | NC    | Pa36  | 30    | 93      | 7   | 9      | na      | na      | na    | na   | 0.5        | 0.7         | 0.3         | 0            | 0            | 0          | 0           |     |
|       |       | Mo18W | 25    | 63      | 10  | 14     | na      | na      | na    | na   | 0.6        | 0.7         | 0.2         | 0            | 0            | 0          | 0           |     |
|       |       | Oh43  | 31    | 74      | 12  | 13     | na      | na      | na    | na   | 0.5        | 0.7         | 0.3         | 0            | 0            | 0          | 0           |     |
|       | Low   | AMF   | B73   | 31      | 67  | 11     | 18      | 87      | 43    | 14.3 | 1.4        | 0.5         | 0.8         | 0.9          | 0.2          | 0.1        | 1           | 0.6 |
|       |       |       | Mo17  | 26      | 66  | 7      | 12      | 87      | 54    | 10.6 | 0.7        | 0.5         | 0.7         | 0.8          | 0.2          | 0.2        | 0.9         | 0.7 |
|       |       |       | HP301 | 21      | 50  | 6      | 11      | 69      | 43    | 7.8  | 0.6        | 0.5         | 0.4         | 0.8          | 0.3          | 0.2        | 1           | 0.5 |
|       |       | M     | Pa36  | 31      | 69  | 10     | 12      | 88      | 54    | 9.3  | 1          | 0.5         | 0.6         | 0.9          | 0.3          | 0.3        | 1           | 0.5 |
| Mo18W |       |       | 22    | 59      | 7   | 12     | 84      | 56      | 10.2  | 0.8  | 0.5        | 0.7         | 0.8         | 0.3          | 0.2          | 0.9        | 0.2         |     |
| Oh43  |       |       | 27    | 69      | 9   | 12     | 75      | 45      | 10.3  | 0.8  | 0.5        | 0.7         | 0.8         | 0.2          | 0.1          | 1          | 0.4         |     |
| NC    |       | B73   | 8     | 10      | 3   | 4      | na      | na      | na    | na   | 0.8        | 0.8         | 0.6         | 0.2          | 0.3          | 0          | 0           |     |
|       |       | Mo17  | 12    | 17      | 4   | 3      | na      | na      | na    | na   | 1.1        | 0.9         | 0.7         | 0.5          | 0.6          | 0          | 0           |     |
|       |       | HP301 | 4     | 6       | 1   | 1      | na      | na      | na    | na   | 0.9        | 0.5         | 0.6         | 0.3          | 0.4          | 0          | 0           |     |
|       |       | Pa36  | 14    | 17      | 6   | 3      | na      | na      | na    | na   | 0.9        | 0.8         | 0.6         | 0.4          | 0.4          | 0          | 0           |     |
|       | Mo18W | 4     | 6     | 2       | 2   | na     | na      | na      | na    | 0.9  | 0.8        | 0.7         | 0.2         | 0.4          | 0            | 0          |             |     |
|       | Oh43  | 6     | 9     | 3       | 2   | na     | na      | na      | na    | 0.9  | 0.8        | 0.6         | 0.2         | 0.4          | 0            | 0          |             |     |
|       | B73   | 17    | 34    | 5       | 6   | 93     | 85      | 16.9    | 0.4   | 0.7  | 0.7        | 1           | 0.4         | 0.4          | 1.1          | 0.5        |             |     |
| M     | Mo17  | 19    | 34    | 5       | 7   | 88     | 79      | 13      | 0.4   | 0.8  | 0.9        | 1.3         | 0.6         | 0.6          | 1.4          | 0.7        |             |     |
|       | HP301 | 14    | 28    | 3       | 5   | 93     | 78      | 10.5    | 0.2   | 0.6  | 0.4        | 0.9         | 0.4         | 0.4          | 1            | 0.5        |             |     |
|       | Pa36  | 22    | 40    | 6       | 6   | 94     | 83      | 14.2    | 0.4   | 0.7  | 0.7        | 1           | 0.5         | 0.5          | 1.1          | 0.6        |             |     |
|       | Mo18W | 15    | 32    | 5       | 7   | 95     | 79      | 11.3    | 0.3   | 0.7  | 0.7        | 0.9         | 0.4         | 0.4          | 1            | 0.5        |             |     |
|       | Oh43  | 19    | 39    | 5       | 6   | 88     | 70      | 21.4    | 0.5   | 0.7  | 0.8        | 1           | 0.4         | 0.4          | 1.1          | 0.5        |             |     |

Characterization of colonized (M) and non-colonized (NC) plants of six selected lines grown under high (53.2 mgP/Kg) or low (7.9 mgP/Kg) phosphorus (P) availability. SDW, shoot dry weight; shoot P, P accumulation in the shoot; RDW, root dry weight, root P, P accumulation in the root; Col Tot, abundance of intra-radical fungal structures; Col Arb, arbuscule abundance; HYP, length density of root-external hyphae, PHC, P uptake from the hyphal compartment; *Pt6*, *Pt8b*, *Pt11*, *Pt13a*, *Pt13b*, *Am3* and *RiEF*, transcript accumulation normalized to

433 **FIGURE LEGENDS**

434 **Fig. 1.** Mycorrhiza response is correlated with enhanced P uptake. (a) Shoot dry weight (SDW, g; normalized with respect to differences among  
 435 replicates) of 30 diverse maize lines grown for 8 weeks, under greenhouse conditions, with (M; right box) or without (NC left box) inoculation with the  
 436 fungus *Funneliformis mosseae*. Boxes show 1st quartile, median and 3rd quartile. Whiskers extend to the most extreme points within 1.5x box length;  
 437 outlying values beyond this range are not shown. The mean values of NC (1.05g, n=540) and M ( 2.16g, n=552) groups are shown by vertical lines.  
 438 Lines ordered by increasing mycorrhizal response from top to bottom. Box shading indicates mean accumulation of P<sup>31</sup> (ppm) in the shoot as  
 439 determined by ionomic analysis, colour-key shown at top of panel. (b) Reaction norms for 30 diverse maize lines contrasting shoot dry-weight (R  
 440 SDW, g; residual SDW with respect to group mean) of non-inoculated plants (NC) and plants inoculated with the fungus *Funneliformis mosseae* (M).  
 441 Segments corresponding to six lines selected for further study are labeled and shown in bold. Point shading indicates accumulation of P<sup>31</sup> (ppm) in the  
 442 shoot as (a). (c) Accumulation of phosphate in leaves (P<sup>31</sup>, ppm) and shoot dry weight (SDW, g) in the 30 maize lines (points correspond to mean  
 443 values). Linear fit (yellow line) and associated 95% confidence interval (shaded area) shown.

444

445 **Fig. 2.** Shoot dry weight (Shoot DW; g) is correlated with total phosphorus (P) accumulation (Shoot P; mg) in six maize genotypes grown with  
 446 (yellow circles) or without (open circles) inoculation with *Rhizophagus irregularis*, under three P regimes (7.9 mgP/kg, 15.5 mgP/kg, 53.2 mgP/kg).  
 447 Points indicate the mean of n observations; whiskers extend +/- 1 standard error; trend lines based on a linear fit to individual observations for each  
 448 treatment.

449



450 **Fig. 3.** Phosphorus (P) accumulation is correlated with the abundance of extra-radical hyphae. (a) percentage of total root length containing  
451 mycorrhizal structures (brown) and arbuscules (yellow) observed in inoculated seedlings of six maize inbred lines, grown under three different levels  
452 of phosphorus abundance (7.9, 15.5 and 53.2 mgP Kg<sup>-1</sup>). Boxes show 1st quartile, median and 3rd quartile. Whiskers extend to the most extreme points  
453 within 1.5x box length. (b) Shoot phosphate acquired from <sup>33</sup>P soil (mg) as a function of the length of external hyphal (m g<sup>-1</sup> soil).

454

455 **Fig. 4.** Accumulation of transcripts encoding PHT1 proteins responds to phosphorus availability and AM colonization. Heatmap representation of  
456 accumulation of selected *ZmPt* (*Pt*) transcripts quantified by real-time PCR relative to *beta-actin*. Accumulation of selected *Pt* transcripts was  
457 quantified in B73 seedling shoot or root tissue. Plants were grown across a range of increasing P availability at 10μM, 100μM, 1000μM P without  
458 inoculation with AMF (NC) and also at 100μM with inoculation with *R. irregularis* at 100μM (M). Mean accumulation was determined from three  
459 biological replicates, standardized (Z-score) within transcripts across experimental treatments and represented on a scale from white (below average  
460 accumulation) to brown (above average accumulation). Accumulation of the maize mycorrhizal marker transcript *Am3* and the *R. irregularis*  
461 elongation factor *RiEF* is also shown. Transcripts responsive to inoculation with AMF marked with an asterisk.

462

463 **Fig. 5.** Accumulation of transcripts encoding PHT1 proteins is correlated with phosphorus accumulation and AMF inoculation across diverse maize  
464 lines. Selected *ZmPt* (*Pt*) transcripts, the maize mycorrhizal marker transcript *Am3* and the *R. irregularis* elongation factor *RiEF* were quantified by  
465 real-time PCR in samples taken from the roots of plants described in Fig. 2. (a) Correlation matrix (Pearson) of transcript accumulation, shoot and root  
466 dry weight (DW, g), shoot and root phosphorus accumulation (P, mg), proportion of root length colonized (% Col, all structures) and proportion of root

467 length containing arbuscules (% Arb). Red circles indicate positive correlation; blue circles indicate negative correlation; the size and intensity of  
468 shading indicate magnitude. Correlations significant at  $p < 0.05$  marked with an asterisk. Correlations significant at  $0.05 < p < 0.1$  marked with a point.  
469 (b) as (a) with data restricted to observations of AM colonized plants grown under low P.

470 **Fig. 6.** AM P uptake is correlated with the extent of the root-external mycelium under low P. Principle component analysis (PCA) of plant-growth,  
471 physiological and molecular observations of inoculated plants grown under low P. Biplot showing scores in the first two principal components (PC1,  
472 PC2) for traits (black arrows: shoot dry weight (shoot DW), shoot P, root dry weight (root DW), root P, total colonization (%Col), arbuscule  
473 abundance (%Arb), length of root-external hyphae (Hyphae), P uptake from the hyphal compartment (PHC), transcript accumulation of *Pt6*, *Pt8b*,  
474 *Pt11*, *Pt13a*, *Pt13b*, *Am3* and *RiEF*) and the individual genotypes (B73, Mo17, HP301, Pa36, Mo18W, Oh43). Points indicating the different  
475 genotypes are colour-coded by mycorrhizal response (MR, g) calculated as the difference in shoot dry weight in colonized and non-colonized plants.

## REFERENCES

- Altschul SF, Gish W, Miller W, Myers EW, Lipman DJ. 1990.** Basic local alignment search tool. *J Mol Biol* **215**: 403-410.
- Baxter IR, Vitek O, Lahner B, Muthukumar B, Borghi M, Morrissey J, Guerinot M Lou, Salt DE. 2008.** The leaf ionome as a multivariable system to detect a plant's physiological status. *Proc Natl Acad Sci USA* **105**: 12081–6.
- Baxter IR. 2015.** Should we treat the ionome as a combination of individual elements, or should we be deriving novel combined traits? *J Exp Bot* **66**: 2127–31.
- Bucher M. 2007.** Functional biology of plant phosphate uptake at root and mycorrhiza interfaces. *New Phytol* **173**: 11–26.
- Bun-Ya M, Nishimura M, Harashima S, Oshima Y. 1991.** The PHO84 gene of *Saccharomyces cerevisiae* encodes an inorganic phosphate transporter. *Mol Cell Biol* **11**: 3229–38.
- Breullin-Sessoms F, Floss DS, Gomez SK, Pumplin N, Ding Y, Levesque-Tremblay V, Noar RD, Daniels DA, Bravo A, Eaglesham JB, et al. 2015.** Suppression of arbuscule degeneration in *Medicago truncatula phosphate transporter4* mutants is dependent on the Ammonium Transporter 2 family protein AMT2;3. *Plant Cell* **27**: 1352–66.
- Cesar SA, Hodge A, Baker A, Baldwin SA. 2014.** Phosphate concentration and arbuscular mycorrhizal colonisation influence the growth, yield and expression of twelve *PHT1* family phosphate transporters in foxtail millet (*Setaria italica*). *PLoS ONE* **9**: e108459.
- Chu Q, Wang X, Yang Y, Chen F, Zhang F, Feng G. 2013.** Mycorrhizal responsiveness of maize (*Zea mays* L.) genotypes as related to releasing date and available P content in soil. *Mycorrhiza* **23**: 497–505.
- Counce P, Keisling TC, Mitchellm AJ. 2000.** A uniform, objective, and adaptive system for expressing rice development. *Crop Science* **40**: 436-443.

- Davidson RM, Hansey CN, Gowda M, Childs KL, Lin H, Vaillancourt B, Sekhon RS, De Leon N, Kaeppler SM, Jiang N, Buell CR. 2011.** Utility of RNA sequencing for analysis of maize reproductive transcriptomes. *Plant Genome* **4**: 191–203.
- Edgar, RC. 2004.** MUSCLE: multiple sequence alignment with high accuracy and high throughput. *Nucleic Acids Res* **32**, 1792-1797.
- Fester T, Sawers R. 2011.** Progress and Challenges in Agricultural Applications of Arbuscular Mycorrhizal Fungi. *Crit Rev Plant Sci* **30**: 459–470.
- Gerlach N, Schmitz J, Polatajko A, Schlüter U, Fahnenstich H, Witt S, Fernie AR, Uroic K, Scholz U, Sonnewald U et al. 2015.** An integrated functional approach to dissect systemic responses in maize to arbuscular mycorrhizal symbiosis. *Plant Cell Environ* **38**: 1591–612.
- Glassop D, Smith SE, Smith FW. 2005.** Cereal phosphate transporters associated with the mycorrhizal pathway of phosphate uptake into roots. *Planta* **222**: 688–698.
- Goodstein, DM, Shu, S, Howson, R, Neupane, R, Hayes, RD, Fazo, J, Mitros, T, Dirks, W, Hellsten, U, Putnam, N, and Rokhsar, DS. 2012.** Phytozome: a comparative platform for green plant genomics. *Nucleic Acids Res* **40**, D1178-1186.
- Grace EJ, Cotsaftis O, Tester M, Smith FA, Smith SE. 2009.** Arbuscular mycorrhizal inhibition of growth in barley cannot be attributed to extent of colonization, fungal phosphorus uptake or effects on expression of plant phosphate transporter genes. *New Phytol* **181**: 938–94.
- Guimil S, Chang HS, Zhu T, Sesma A, Osbourn A, Roux C, Ioannidis V, Oakeley EJ, Docquier M, Descombes P, Briggs SP et al. 2005.** Comparative transcriptomics of rice reveals an ancient pattern of response to microbial colonization. *Proc Natl Acad Sci U S A* **102**: 8066–8070.
- Gutjahr C, Banba M, Croset V, An K, Miyao A, An G, Hirochika H, Imaizumi-Anraku H, Paszkowski U. 2008.** Arbuscular mycorrhiza-specific signaling in rice transcends the common symbiosis signaling pathway. *Plant Cell* **20**: 2989–3005.

- Gutjahr C, Sawers RJH, Marti G, Andrés-Hernández L, Yang SY, Casieri L, Angliker H, Oakeley EJ, Wolfender JL, Abreu-Goodger C, Paszkowski U. 2015.** Transcriptome diversity among rice root types during asymbiosis and interaction with arbuscular mycorrhizal fungi. *Proc Natl Acad Sci U S A*. **112**: 6754-9.
- Harrison MJ, Dewbre GR, Liu J. 2002.** A phosphate transporter from *Medicago truncatula* involved in the acquisition of phosphate released by arbuscular mycorrhizal fungi. *Plant Cell* **14**: 2413–2429.
- Hetrick BAD, Wilson GWT, Cox TS. 1992.** Mycorrhizal dependence of modern wheat varieties, landraces, and ancestors. *Can J Bot* **70**: 2032–2040.
- Hetrick BAD, Wilson GWT, Cox TS. 1996.** Mycorrhizal response in wheat cultivars: relationship to phosphorus. *Can J Bot* **74**: 19–25.
- Hong JJ, Park Y-S, Bravo A, Bhattarai KK, Daniels DA, Harrison MJ. 2012.** Diversity of morphology and function in arbuscular mycorrhizal symbioses in *Brachypodium distachyon*. *Planta* **236**: 851–65.
- Jakobsen I, Abbott LK, Robson AD. 1992.** External hyphae of vesicular-arbuscular mycorrhizal fungi associated with *Trifolium subterraneum* L.. *New Phytol* **120**: 371-380.
- Jakobsen I, Gazey C, Abbott LK. 2001.** Phosphate transport by communities of arbuscular mycorrhizal fungi in intact soil cores. *New Phytol* **149**: 95–103.
- Janos DP. 2007.** Plant responsiveness to mycorrhizas differs from dependence upon mycorrhizas. *Mycorrhiza* **17**: 75–91.
- Javot H, Penmetsa R V, Terzaghi N, Cook DR, Harrison MJ. 2007.** A *Medicago truncatula* phosphate transporter indispensable for the arbuscular mycorrhizal symbiosis. *Proc Natl Acad Sci USA* **104**: 1720–1725.
- Kaeppeler SM, Parke JL, Mueller SM, Senior L, Stuber C, Tracy WF. 2000.** Variation among maize inbred lines and detection of quantitative trait loci for growth at low phosphorous and responsiveness to arbuscular mycorrhizal fungi. *Crop Sci* **40**: 358–364.

- Karandashov V, Bucher M. 2005.** Symbiotic phosphate transport in arbuscular mycorrhizas. *Trends Plant Sci* **10**: 22–9.
- Kobae Y, Hata S. 2010.** Dynamics of periarbuscular membranes visualized with a fluorescent phosphate transporter in arbuscular mycorrhizal roots of rice. *Plant Cell Physiol* **51**: 341–53.
- Koide RT, Li M, Lewis J, Irby C. 1988.** Role of mycorrhizal infection in the growth and reproduction of wild vs. cultivated plants. *Oecologia* **77**: 537–543.
- Kormanik PP, McGraw A-C. 1982.** Quantification of vesicular-arbuscular mycorrhizae in plant roots. In: Schenck NC, ed. *Methods and Principles of Mycorrhizal Research*. St Paul, Minnesota: American Phytopathol Soc., 37-46.
- Li P, Ponnala L, Gandotra N, Wang L, Si Y, Tausta SL, Kebrom TH, Provart N, Patel R, Myers CR, et al. 2010.** The developmental dynamics of the maize leaf transcriptome. *Nat Genet* **42**: 1060–1067.
- Liu F, Xu Y, Jiang H, Jiang C, Du Y, Gong C, Wang W, Zhu S, Han G, Cheng B. 2016.** Systematic identification, evolution and expression analysis of the *Zea mays* *PHT1* gene family reveals several new members involved in root colonization by arbuscular mycorrhizal fungi. *Int J Mol Sci* **17**: 10.3390/ijms17060930
- Liu Y, Shi G, Mao L, Cheng G, Jiang S, Ma X, An L, Du G, Collins Johnson N, Feng H. 2012.** Direct and indirect influences of 8 yr of nitrogen and phosphorus fertilization on *Glomeromycota* in an alpine meadow ecosystem. *New Phytol* **194**: 523–535.
- Lynch JP. 2011.** Root phenes for enhanced soil exploration and phosphorus acquisition: tools for future crops. *Plant Physiol* **156**: 1041–1049.
- Maeda D, Ashida K, Iguchi K, Chechetka SA, Hijikata A, Okusako Y, Deguchi Y, Izui K, Hata S. 2006.** Knockdown of an arbuscular mycorrhiza-inducible phosphate transporter gene of *Lotus japonicus* suppresses mutualistic symbiosis. *Plant Cell Physiol* **47**: 807–17.

- McMullen MD, Kresovich S, Villeda HS, Bradbury P, Li H, Sun Q, Flint-Garcia S, Thornsberry J, Acharya C, Bottoms C, et al. 2009.** Genetic properties of the maize nested association mapping population. *Science* **325**: 737–40.
- Mudge SR, Rae AL, Diatloff E, Smith FW. 2002.** Expression analysis suggests novel roles for members of the *Pht1* family of phosphate transporters in *Arabidopsis*. *Plant J* **31**: 341-353.
- Munkvold L, Kjølner R, Vestberg M, Rosendahl S, Jakobsen I. 2004.** High functional diversity within species of arbuscular mycorrhizal fungi. *New Phytol* **164**: 357–364.
- Nagy R, Karandashov V, Chague V, Kalinkevich K, Tamasloukht M, Xu G, Jakobsen I, Levy AA, Amrhein N, Bucher M. 2005.** The characterization of novel mycorrhiza-specific phosphate transporters from *Lycopersicon esculentum* and *Solanum tuberosum* uncovers functional redundancy in symbiotic phosphate transport in solanaceous species. *Plant J* **42**: 236–50.
- Nazeri NK, Lambers H, Tibbett M, Ryan MH. 2013.** Do arbuscular mycorrhizas or heterotrophic soil microbes contribute toward plant acquisition of a pulse of mineral phosphate? *Plant Soil* **373**: 699–710.
- Nagy R, Vasconcelos MJ V, Zhao S, McElver J, Bruce W, Amrhein N, Raghothama KG, Bucher M. 2006.** Differential regulation of five *Pht1* phosphate transporters from maize (*Zea mays* L.). *Plant Biol* **8**: 186–197.
- Newman EI. 1966.** A method for estimating the total length of root in a sample. *J Appl Ecol* **3**: 139-145.
- Olsen SR, Cole CV, Watanabe FS, Dean LA. 1954.** Estimation of available phosphorus in soils by extraction with sodium bicarbonate. *USDA Circular* No 939.
- Parniske M. 2008.** Arbuscular mycorrhiza: the mother of plant root endosymbioses. *Nat Rev Microbiol* **6**: 763–775.

- Paszkowski, U, Boller, T. 2002.** The growth defect of *lrt1*, a maize mutant lacking lateral roots, can be complemented by symbiotic fungi or high phosphate nutrition. *Planta* **214**: 584–590.
- Paszkowski U, Kroken S, Roux C, Briggs SP. 2002.** Rice phosphate transporters include an evolutionarily divergent gene specifically activated in arbuscular mycorrhizal symbiosis. *Proc Natl Acad Sci USA* **99**: 13324–13329.
- Paszkowski U, Jakovleva L, Boller T. 2006.** Maize mutants affected at distinct stages of the arbuscular mycorrhizal symbiosis. *Plant J* **47**: 165–173.
- Pearson JN, Jakobsen I. 1993.** The relative contribution of hyphae and roots to phosphorus uptake by arbuscular mycorrhizal plants measured by dual labelling with  $^{32}\text{P}$  and  $^{33}\text{P}$ . *New Phytol* **124**: 489–494.
- Perez-Montano F, Alias-Villegas C, Bellogin RA, del Cerro P, Espuny MR, Jimenez-Guerrero I, Lopez-Baena FJ, Ollero FJ, Cubo T. 2014.** Plant growth promotion in cereal and leguminous agricultural important plants: From microorganism capacities to crop production. *Microbiol Res* **169**: 325–336.
- Pumplin N, Zhang X, Noar RD, Harrison MJ. 2012.** Polar localization of a symbiosis-specific phosphate transporter is mediated by a transient reorientation of secretion. *Proc Natl Acad Sci USA* **109**: E665-672.
- Rausch C, Daram P, Brunner S, Jansa J, Laloi M, Leggewie G, Amrhein N, Bucher M. 2001.** A phosphate transporter expressed in arbuscule-containing cells in potato. *Nature* **414**: 462–70.
- Rose TJ, Rose MT, Pariasca-Tanaka J, Heuer S, Wissuwa M. 2011.** The Frustration with Utilization: Why Have Improvements in Internal Phosphorus Utilization Efficiency in Crops Remained so Elusive? *Front Plant Sci* **2**: 73.



- Sawers RJH, Gebreselassie MN, Janos DP, Paszkowski U. 2010.** Characterizing variation in mycorrhiza effect among diverse plant varieties. *Theor Appl Genet* **120**: 1029–1039.
- Sawers RJ, Gutjahr C, Paszkowski U. 2008.** Cereal mycorrhiza: an ancient symbiosis in modern agriculture. *Trends Plant Sci* **13**: 93–97.
- Schnepf A, Roose T, Schweiger P. 2008.** Impact of growth and uptake patterns of arbuscular mycorrhizal fungi on plant phosphorus uptake - A modelling study. *Plant Soil* **312**: 85–99.
- Schweiger PF, Jakobsen I. 1999.** Direct Measurement of Arbuscular Mycorrhizal Phosphorus Uptake into Field-Grown Winter Wheat. *Agronomy J* **91**: 998-1002.
- Schweiger PF, Thingstrup I, Jakobsen I. 1999.** Comparison of two test systems for measuring plant phosphorus uptake via arbuscular mycorrhizal fungi. *Mycorrhiza* **8**: 207–213.
- Sen, TZ, Harper, LC, Schaeffer, ML, Andorf, CM, Seigfried, T, Campbell, DA, Lawrence, CJ. 2010.** Choosing a genome browser for a model organism database: surveying the maize community. *Database*: baq007.
- Schnable JC, Springer NM, Freeling M. 2011.** Differentiation of the maize subgenomes by genome dominance and both ancient and ongoing gene loss. *Proc Natl Acad Sci USA* **108**: 4069–4074.
- Schnable, PS, Ware D, Fulton RS, Stein JC, Wei F, Pasternak S, Liang C, Zhang J, Fulton L, Graves TA, et al. 2009.** The B73 maize genome: complexity, diversity, and dynamics. *Science* **326**: 1112-1115.
- Smith SE, Read DJ. 2008.** *Mycorrhizal symbiosis*. Cambridge, UK: Academic Press.
- Smith SE, Smith FA, Jakobsen I. 2003.** Mycorrhizal fungi can dominate phosphate supply to plants irrespective of growth responses. *Plant Physiol* **133**: 16–20.

- Smith SE, Smith FA, Jakobsen I. 2004.** Functional diversity in arbuscular mycorrhizal (AM) symbioses: the contribution of the mycorrhizal P uptake pathway is not correlated with mycorrhizal responses in growth or total P uptake. *New Phytol* **162**: 511-524.
- Sokolski S, Sguin S, Khasa D, Levesque CA, Piche Y. 2010.** Conspecificity of DAOM 197198, the model arbuscular mycorrhizal fungus, with *Glomus irregulare*: molecular evidence with three protein-encoding genes. *Botany* **88**: 829-838.
- Syers J, Johnston A, Curtin D. 2008.** Efficiency of soil and fertilizer phosphorus use Reconciling changing concepts of soil phosphorus behaviour with agronomic information. *FAO Fertilizer and Plant Nutrition Bulletin no 18*. Rome, Italy: FAO
- Vance CP. 2014.** Symbiotic nitrogen fixation and phosphorus acquisition. Plant nutrition in a world of declining renewable resources. *Plant Physiol* **127**: 390–397.
- Veneklaas EJ, Lambers H, Bragg J, Finnegan PM, Lovelock CE, Plaxton WC, Price CA, Scheible WR, Shane MW, White PJ, Raven J. 2012.** Opportunities for improving phosphorus-use efficiency in crop plants. *New Phytol* **195**: 306–320.
- Volpe V, Giovannetti M, Sun XG, Fiorilli V, Bonfante P. 2016.** The phosphate transporters *LjPT4* and *MtPT4* mediate early root responses to phosphate status in non mycorrhizal roots. *Plant Cell Environ* **39**: 660-71.
- Walder F, Brulé D, Koegel S, Wiemken A, Boller T, Courty P-E. 2015.** Plant phosphorus acquisition in a common mycorrhizal network: regulation of phosphate transporter genes of the *Pht1* family in sorghum and flax. *New Phytol* **205**: 1632–45.
- Walder F, Niemann H, Natarajan M, Lehmann MF, Boller T, Wiemken A. 2012.** Mycorrhizal networks: common goods of plants shared under unequal terms of trade. *Plant Physiol* **159**: 789–97.

- Willmann M, Gerlach N, Buer B, Polatajko A, Nagy R, Koebke E, Jansa J, Flisch R, Bucher M. 2013.** Mycorrhizal phosphate uptake pathway in maize: vital for growth and cob development on nutrient poor agricultural and greenhouse soils. *Front Plant Sci* **4**: 533.
- Wang X, Elling AA, Li X, Li N, Peng Z, He G, Sun H, Qi Y, Liu XS, Deng XW. 2009.** Genome-wide and organ-specific landscapes of epigenetic modifications and their relationships to mRNA and small RNA transcriptomes in maize. *Plant Cell* **21**: 1053–1069.
- Yang SY, Grønlund M, Jakobsen I, Grotemeyer MS, Rentsch D, Miyao A, Hirochika H, Kumar CS, Sundaresan V, Salamin N *et al.* 2012.** Nonredundant regulation of rice arbuscular mycorrhizal symbiosis by two members of the *PHOSPHATE TRANSPORTER1* gene family. *Plant Cell* **24**: 4236–4251.
- Yao Q, Li XL, Feng G, Christie P. 2001.** Influence of extramatrical hyphae on mycorrhizal dependency of wheat genotypes. *Commun Soil Sci Plant Anal* **32**: 3307–3317.
- Ziegler G, Terauchi A, Becker A, Armstrong P, Hudson K, Baxter I. 2013.** Ionomics screening of field-grown soybean identifies mutants with altered seed elemental composition. *Plant Genome* **6**: 1–9.

## SUPPORTING INFORMATION

The following Supporting Information is available for this article:

**Fig. S1** Association with mycorrhizal fungi promotes vegetative growth in diverse maize lines

**Fig. S2** Inoculation with AMF is associated with changes in the ionome

**Fig. S3** Oh43 and Mo18W differ in elemental profile

**Fig. S4** Shoot dry weight is correlated with seed size

**Fig. S5** Phylogeny of maize PHT1 proteins

**Fig. S6** Maize *PHT1* transcripts accumulate throughout the plant life-cycle

**Fig. S7** Accumulation of six *ZmPt* (*Pt*) transcripts in root-samples

**Table S1** Element accumulation in roots and leaves of non-inoculated and inoculated plants

**Table S2** Phosphorus transfer data at low P

**Table S3** *Pht1* genes of maize (var. B73)

**Table S4** Primers used in this study

**Supplementary Analysis**

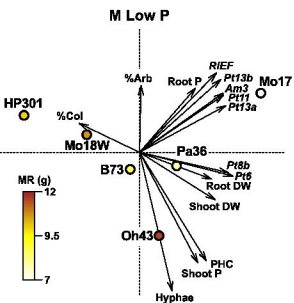



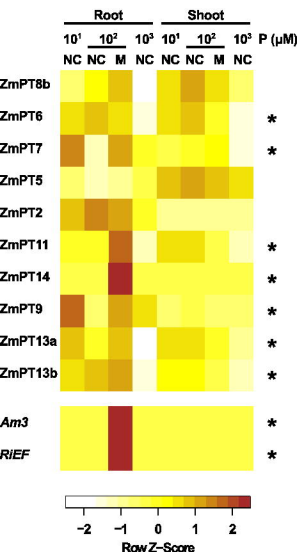

**(a)**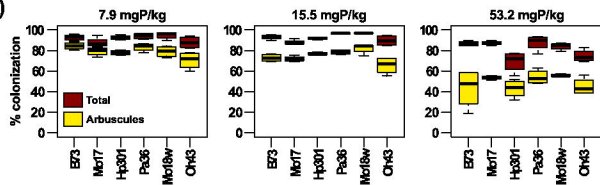**(b)**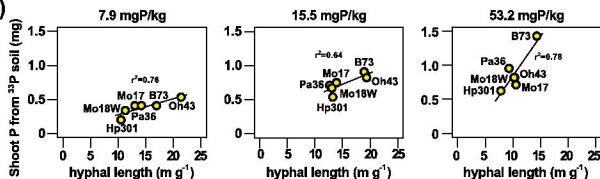



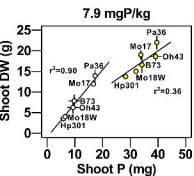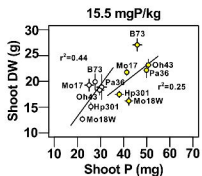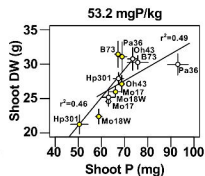

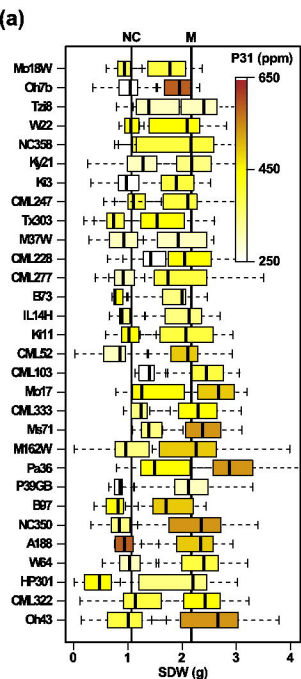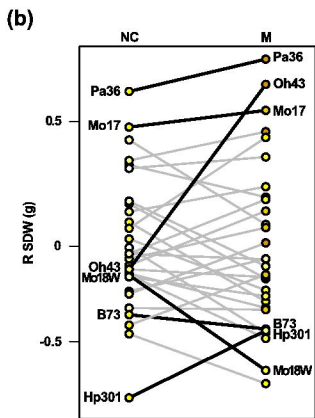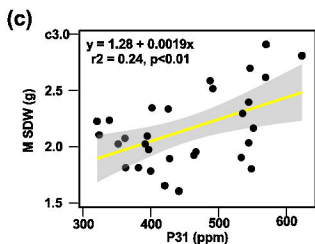

Source: https://www.biorxiv.org/content/10.1101/042028v2.full.pdf
